# Supplementary material for: Adjunctive Thymosin Beta-4 Treatment Influences PMN Effector Cell Function during Pseudomonas aeruginosa-Induced Corneal Infection
Source: MDPI journal article supplement (doi:10.3390/cells10123579), 2021-12-18
Supplement: s1 [file s1]

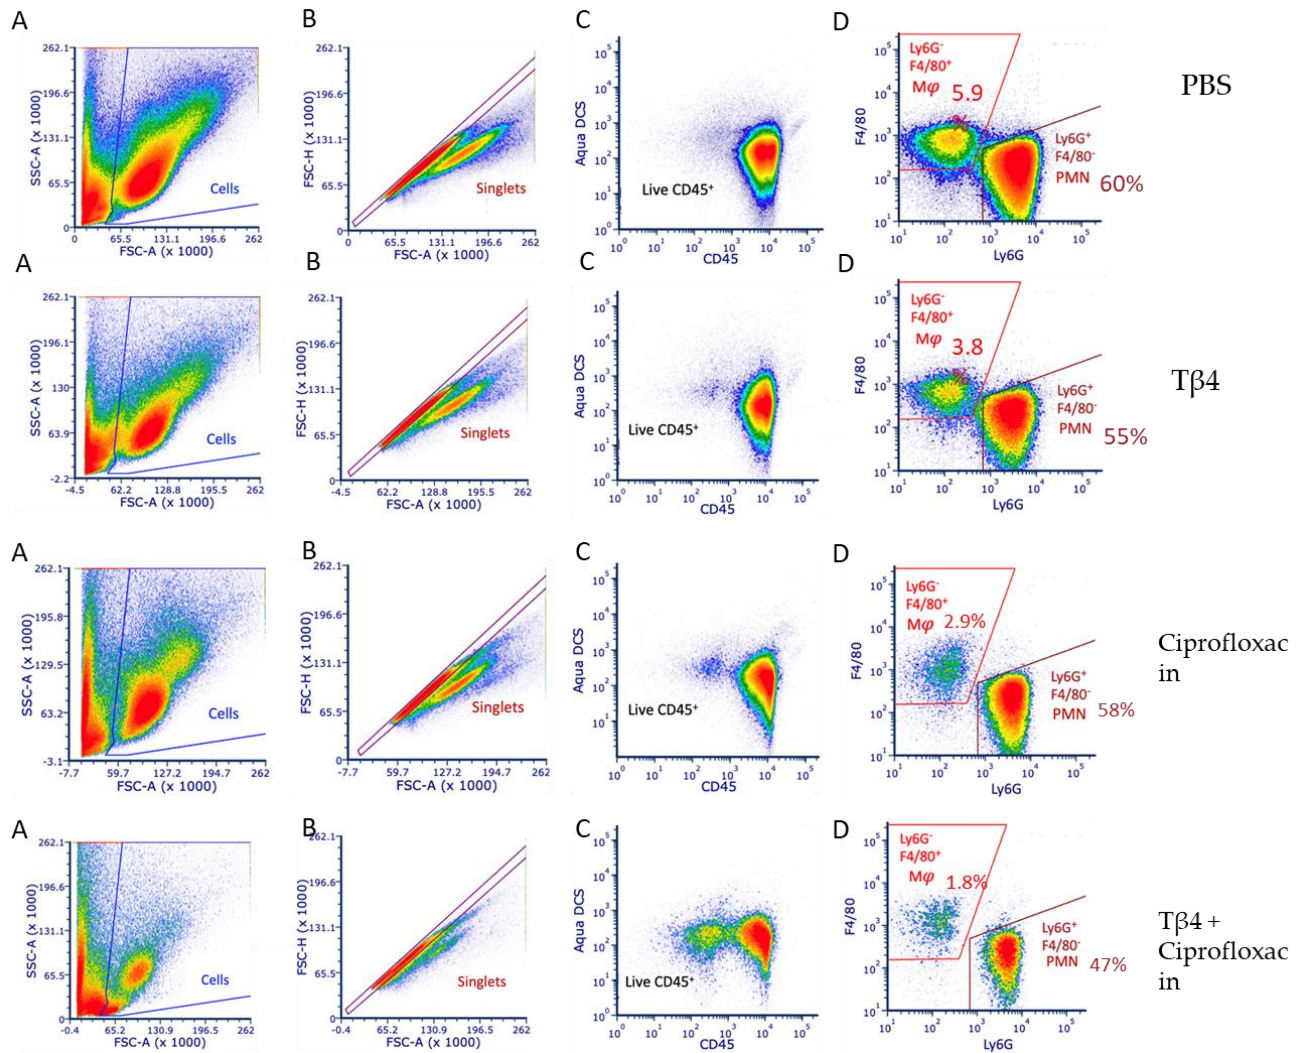

**Figure S1.** Gating strategy used to identify PMN. **Panel A:** Forward and side scatter density plots identify cell population of interest and excluding debris;. **Panel B:** from gating A, Forward scatter height(FSC-H) versus forward scatter area density (FSC-A) plot further characterized the cell populations to exclude doublet;. **Panel C:** From gating B, the singlets are characterized by CD45 and LIVE/DEADTM Fixable Aqua dead cell stain to get live CD45<sup>+</sup> cell population. **Panel D:** Live CD45<sup>+</sup> cells from gating C are further labeled by Ly6G and F4/80 to discriminate PMN from Mφ.
